# Supplementary material
Source: publisher site journal article supplement (https://www.dovepress.com/article/555992)
Supplement: Supplementary file 1 [file Supplementary%20Table%201.docx]

**Supplementary table 1.** Distribution of microorganisms detected by mNGS in culture-negative PJI patients across study groups

| Organism | CN-AWD group, n (%) | CN-STA group, n (%) | CN-LTA group, n (%) |
| --- | --- | --- | --- |
| Staphylococcus aureus | 1 (20.0) | 6 (42.9) | 5 (41.7) |
| MSSA | 1 (20.0) | 3 (21.4) | 3 (25.0) |
| MRSA | 0 (0) | 3 (21.4) | 2 (16.7) |
| Staphylococcus epidermidis | 2 (40.0) | 3 (21.4) | 1 (8.3) |
| Staphylococcus capitis | 0 (0) | 1 (7.1) | 0 (0) |
| Streptococcus | 1 (20.0) | 1 (7.1) | 1 (8.3) |
| Pseudomonas aeruginosa | 0 (0) | 1 (7.1) | 0 (0) |
| Escherichia coli | 1 (20.0) | 2 (14.3) | 1 (8.3) |
| Staphylococcus haemolyticus | 0 (0) | 0 (0) | 2 (16.7) |
| Enterococcus faecalis | 0 (0) | 0 (0) | 1 (8.3) |
| Staphylococcus hominis | 0 (0) | 0 (0) | 1 (8.3) |

CN, culture negative; AWD, antibiotic-withdrawal; STA, short-term antibiotic; LTA, long-term antibiotic; MRSA, methicillin-resistant S. aureus; MSSA, methicillin-susceptible S. aureus.
